# Supplementary material for: Mycobacterium tuberculosis Central Metabolism Is Key Regulator of Macrophage Pyroptosis and Host Immunity
Source: MDPI journal article supplement (doi:10.3390/pathogens12091109), 2023-08-30
Supplement: s1 [file s1]

## Supporting Information

### Materials and Methods

#### Mycobacteria strains and culture conditions.

A complete list of mycobacteria strains used in this study is presented in Table S1. For routine growth, mycobacteria were grown in Middlebrook 7H9 broth (Difco, Sparks, MD) supplemented with 10% (v/v) OADC enrichment (BD Diagnostic Systems), 0.5% (v/v) glycerol, and 0.05% (v/v) tyloxapol or Middlebrook 7H10 agar (Difco, Sparks, MD) containing 10% (v/v) OADC enrichment, and 0.5% (v/v) glycerol. Selection antibiotics were used at the following concentrations: kanamycin 40  $\mu\text{g mL}^{-1}$ , hygromycin 75  $\mu\text{g mL}^{-1}$ , apramycin 40  $\mu\text{g mL}^{-1}$ . Auxotrophic *M. tuberculosis* strains were grown in the presence of D-leucine 50  $\mu\text{g mL}^{-1}$  and/or D-pantothenate 25  $\mu\text{g mL}^{-1}$ , as needed. In all cases, mycobacteria were grown at 37 °C, shaken at 100–125 rpm.

#### Monocyte / M $\Phi$ and cell culture conditions.

THP-1 cells (ATCC# TIB-202), a human acute monocytic leukemia cell line, were grown in suspension using complete RPMI media [RPMI (Invitrogen) supplemented with 0.5% MEM essential amino acids (Invitrogen cat # 11130-051), 0.5% MEM nonessential amino acids (Invitrogen cat # 11140-050), 10 mM HEPES (Invitrogen), 55  $\mu\text{M}$   $\beta$ -mercaptoethanol, 10% heat-inactivated fetal calf serum (Gemini)]. Cells were maintained at a concentration of  $2 \times 10^5 - 8 \times 10^5$  cells  $\text{mL}^{-1}$  in humidified 37 °C / 5%  $\text{CO}_2$  incubators.

For differentiation into adherent M $\Phi$ , THP-1 cells were counted, centrifuged at 1500 rpm for 10 min and resuspended in complete RPMI media containing 50 nM phorbol 12-myristate 13-acetate (PMA, Sigma cat # P8139) at a concentration of  $1 \times 10^6$  cells  $\text{mL}^{-1}$ . Cells were then seeded into Costar microtiter plates and incubated  $\geq 16$  hr prior to experiments.

For human primary cell experiments, CD14<sup>+</sup> monocytes were isolated from peripheral blood mononuclear cells (PBMC) by using a positive selection CD14 microbeads and MACS column according to the manufacturer's protocols (Miltenyi Biotech cat # 130-050-201). Selected monocytes were resuspended in complete RPMI media containing 10% AB Human serum (Gemini cat # 100-512) seeded into a 48 well microtiter plate for 7 days prior to infection. Cells were maintained at a concentration in humidified 37 °C / 5%  $\text{CO}_2$  incubators. Cell densities were then adjusted to  $1 \times 10^6$  cells  $\text{mL}^{-1}$  prior to experiments.

#### Live-cell Hoechst 33258 staining of THP-1 macrophage

3 days post-infection, the media from mycobacteria-infected THP-1 monolayers were stained in 1  $\mu\text{g mL}^{-1}$  Hoechst 33258 (Sigma cat # B2883), 1X PBS added. Monolayers were incubated at 37 °C for 10 min, then visualized by fluorescence microscopy under 200 $\times$  magnification in the blue channel (BP330-385 filter). Cells undergoing cell death would take up the Hoechst nuclear stain; condensed or fragmented nuclear morphology suggested apoptotic or pyroptotic (but not necrotic) cell death.

#### Transposon mutagenesis of mycobacteria and screen methodology

High-titer phage derived from phasmid pHA180, and containing *mariner* transposon construct pMycMar [104,105], was used to mutagenize *M. bovis* BCG strain mc<sup>2</sup>6455 by transduction. For construction of the transposon mutant library plates, 10,000 transposon mutants (individual Km<sup>R</sup> colonies) were picked and inoculated into separate wells of 96-well microtiter plates, containing of 7H9 broth with 40  $\mu\text{g mL}^{-1}$  kanamycin. These transposon library master plates were incubated at 37 °C until saturated.

96-well mc<sup>2</sup>6455 transposon mutant library was subcultured to an OD<sub>600nm</sub> of approximately 0.2 and used to infect THP-1 macrophage in 96-well plate format. THP-1 cells were prepped for infection as described above. Monolayers were infected with the mc<sup>2</sup>6455

transposon mutant library by multichannel pipette using the methods described above. After 4 days infection, THP-1 monolayers were live-cell stained with Hoechst stain and visualized by microscopy (see above). Wells showing increased Hoechst staining were marked as candidate *fdR* (functioning death repressor) mutants for further study.

The *mariner* transposon used contains an oriR6K $\gamma$  that allows for the recovery of transposon-chromosome junctions as replicating plasmids. To map transposon insertion sites, transposon mutant genomic DNA was digested with BssHII, ligated, and transformed into DH5 $\alpha$ - $\lambda$ pir cells, which support oriR6K $\gamma$  replication. Recovered plasmids were sequenced, and sequence data compared to the *M. tuberculosis* H37Rv annotated genome [106] by BLASTn (NCBI) to identify transposon insertion sites.

### Terminal deoxynucleotidyl transferase dUTP nick end labeling (TUNEL).

*In Situ* Cell Death Detection Kit, Fluorescein (Roche) was used to detect DNA fragmentation in adhered cells by microscopy. Briefly,  $4 \times 10^5$  THP-1 cells were seeded onto 12 mm glass coverslips in 24 well plates, following differentiation protocol above. Infections with various mycobacteria strains were done as described, and 4 days post-infection, coverslips were fixed in 2% paraformaldehyde for 30 min at 37°C. TUNEL staining protocol was done, according to the manufacturer's instructions. Stained monolayers were visualized by fluorescence microscopy using 200 $\times$  magnification under the green channel (S492/18 $\times$  filter). DNA fragmentation would result in TUNEL positive cells. For each sample, cells were counted from three different fields; with 100 cells counted per field.

### Detection of caspase-dependent cell death versus necrosis.

FAM-FLICA *in vitro* poly-caspases assay kit (Immunochemistry Technologies) was used to detect active caspases in infected THP-1 cells by microscopy, and distinguish caspase-dependent cell death from necrosis. Briefly,  $4 \times 10^5$  THP-1 cells were seeded onto 12 mm glass coverslips in 24 well plates, following differentiation protocol above. Infections with various mycobacteria strains were done as described, and 3 days post-infection, coverslips were stained propidium iodide and FAM-VAD-fmk, according to the manufacturer's instructions for adhered cells. Stained monolayers were visualized by fluorescence microscopy using 200 $\times$  magnification under the green and red channels (S492/18 $\times$  and S572/23 $\times$  filters, respectively). Necrotic cell death would result propidium iodide positive and caspase negative cells, while caspase-dependent cell death would result in caspase positive and either propidium iodide negative (apoptosis) or positive (pyroptosis) cells. For each sample, cells were counted from three different fields; with 100 cells counted per field.

### Specialized transduction for the generation of precise null mutants.

Allelic exchange substrate for deletion of Rv3727 were generated by cloning PCR products containing left and right homologous arms to the gene of interest, into Van91I-digested p0004S (Hyg<sup>R</sup> AES cloning vector, T. Hsu and W.R. Jacobs, unpublished). Primers used were: Rv3727\_LL\_AlwNI [5' TTT TTT TTC AGA AAC TGC GGT TCG TCC TCG GCT ACA C 3'], Rv3727\_LR\_AlwNI [5' TTT TTT TTC AGT TCC TGA TCG GCA CTG GAA GTT CTT TGA TGT CTC ACT GAG GTC TCT GGC AAT CAC GAC GTG GGT ATC 3'], Rv3727\_RL\_Van91I [5' TTT TTT TCC ATA GAT TGG ACC AAT CGT CCA TAC TAG GAC GAG TGT CTG GTC TCG TAG CCA CCT GAC CGA CGT GGA 3'], Rv3727\_RR\_Van91I [5' TTT TTT TTC CAT CTT TTG GAA CCA GTT CCC CGA CGC TTT 3']. Phasmids for allelic exchange were generated by cloning PacI linearized AES into the unique PacI site of pHA159 [107].

High-titer phage derived from allelic exchange phasmids were used to transduce *M. bovis* BCG Danish and *M. tuberculosis* H37Rv  $\Delta$ panCD  $\Delta$ leuCD strains. One milliliter of high-titer phage was added to 1 mL of cells, and transductions incubated at 37 °C for 24

hr. Following this, each transduction was plated on two 7H10 agar plates containing 75 µg mL<sup>-1</sup> hygromycin. Plates were incubated 3 weeks at 37 °C.

Hyg<sup>R</sup> transductants were inoculated into 5 mL 7H9 broth containing 75 µg mL<sup>-1</sup> hygromycin and grown to saturation. Transductants were screened for gene deletion by PCR of genomic DNA, using primers: Rv3727\_LL\_noRE [5' CGG TTC GTC CTC GGC TAC AC 3'], Rv3727\_RR\_noRE [5' AAC CAG TTC CCC GAC GCT TT 3'].

### Animal studies

6–8 week-old female wild type C57BL/6 mice were obtained from Jackson Laboratories. All mice were maintained in specific pathogen-free conditions. All procedures involving the use of animals were in compliance with protocols approved by the Albert Einstein College of Medicine Institutional Animal Care and Use Committee (IACUC Protocol # 20090309) and Biosafety Committees.

### RNA purification from mycobacteria.

RNA was extracted and purified using the Fast RNA prep and QIAGEN RNeasy systems. Between 10<sup>8</sup> – 10<sup>9</sup> cfu of mycobacteria were resuspended in 1 mL Buffer RLT containing β-mercaptoethanol (RNeasy kit, QIAGEN), and aliquoted into a Lysing Matrix B tube (Qbiogene). Samples were processed in a FastPrep FP120 machine (Qbiogene) 1 time for 45 sec at speed 6, and immediately placed on ice. After 1 min incubation, supernatants were mixed with 100% ethanol to a final concentration of 45%, and processed according to the standard instructions and reagents provided with the QIAGEN RNeasy kit.

For RNA isolation from intracellular mycobacteria, to isolate approximately 10<sup>9</sup> intracellular bacteria from infected THP-1 cells, infection protocol described above was scaled up to T-175 flasks containing 3 × 10<sup>7</sup> MΦ per flask, with 9 flasks infected in triplicate per mycobacteria strain. THP-1 cells were infected with mycobacteria strains at an MOI of 5:1. 3 days post infection, intracellular bacteria were harvested monolayers using the protocol from [108].

RNA quantity and quality was assessed with a NanoDrop-1000 micro-volume UV-Vis spectrophotometer (Thermo Scientific). RNA samples were aliquoted into 5 µg portions and stored at –80 °C until needed.

### RNA purification from mycobacteria-infected THP-1 cells.

RNA was extracted and purified using the QIAGEN RNeasy kit, from 2 × 10<sup>6</sup> THP-1 cells that had been previously infected by mycobacteria as described above. 3 days post-infection, media was aspirated from THP-1 cells and 1 mL RNAprotect Cell Reagent (QIAGEN) added. THP-1 cells were resuspended in Buffer RLT containing β-mercaptoethanol, homogenized using the QIAshredder spin column. Absolute ethanol was added to the lysate to a final concentration of 50%, and samples processed according to the standard instructions and reagents provided with the QIAGEN RNeasy kit. RNA quantity and quality was assessed with a NanoDrop-1000 micro-volume UV-Vis spectrophotometer (Thermo Scientific). Quality was also checked by Agilent 2100 Bioanalyzer total RNA assay, using a Nano RNA Chip. RNA samples were aliquoted into 10 µg portions and stored at –80 °C until needed.

**Table S1.** Bacterial strains used in this study.

| Strain                                                                                                         | Genotype                                                                                                                                   | Reference  |
|----------------------------------------------------------------------------------------------------------------|--------------------------------------------------------------------------------------------------------------------------------------------|------------|
| mc <sup>2</sup> 6206 <i>M. tuberculosis</i> H37Rv $\Delta$ panCD $\Delta$ leuCD                                | gift of M.H. Larsen                                                                                                                        |            |
|                                                                                                                | and K.E. Biermann                                                                                                                          |            |
| mc <sup>2</sup> 6887 <i>M. kansasii</i> Hauduroy                                                               | ATCC 12478                                                                                                                                 | [109]      |
| mc <sup>2</sup> 6450 <i>M. bovis</i> BCG Danish strain 1331                                                    |                                                                                                                                            | [110]      |
| mc <sup>2</sup> 6455 mc <sup>2</sup> 6450 $\Delta$ ureC::fbpBp/fbpB <sub>ss</sub> '-pfoA(G137Q) <sub>Δss</sub> |                                                                                                                                            | [31]       |
| mc <sup>2</sup> 6405 <sup>a</sup>                                                                              | mc <sup>2</sup> 6455 Rv0947c::magellan4 (fdr5)                                                                                             | †          |
| mc <sup>2</sup> 6406                                                                                           | mc <sup>2</sup> 6455 arcA::magellan4 (fdr16)                                                                                               | †          |
| mc <sup>2</sup> 6408 <sup>a</sup>                                                                              | mc <sup>2</sup> 6455 Rv1831::magellan4 (fdr2)                                                                                              | †          |
| mc <sup>2</sup> 6409 <sup>a</sup>                                                                              | mc <sup>2</sup> 6455 Rv1953::magellan4; TB16.3::magellan4 (fdr12)                                                                          | †          |
| mc <sup>2</sup> 6410 mc <sup>2</sup> 6455 tmk-mtrA::magellan4 (fdr17)                                          |                                                                                                                                            | †          |
| mc <sup>2</sup> 6412 <sup>a,b</sup>                                                                            | mc <sup>2</sup> 6455 Rv3727::magellan4 (fdr8)                                                                                              | †          |
| mc <sup>2</sup> 6413 <sup>a,b</sup>                                                                            | mc <sup>2</sup> 6455 Rv3727::magellan4 (fdr15)                                                                                             | †          |
| mc <sup>2</sup> 6414                                                                                           | mc <sup>2</sup> 6455 tcrX::magellan4 (fdr4)                                                                                                | †          |
| mc <sup>2</sup> 6417 <sup>a</sup>                                                                              | mc <sup>2</sup> 6455 Rv1204c::magellan4 (fdr11)                                                                                            | †          |
| mc <sup>2</sup> 6427                                                                                           | mc <sup>2</sup> 6450 $\Delta$ Rv3727::γδres-sacB-hyg-γδres                                                                                 | †          |
| mc <sup>2</sup> 6444                                                                                           | mc <sup>2</sup> 6455 $\Delta$ Rv3727::γδres-sacB-hyg-γδres                                                                                 | †          |
| mc <sup>2</sup> 6891 <sup>c</sup>                                                                              | mc <sup>2</sup> 6405 glyV::1A7 (integrating cosmid containing <i>M. tuberculosis</i> genome region 'Rv0946c-Rv0977c', † Hyg <sup>R</sup> ) | [111]      |
| mc <sup>2</sup> 6892 <sup>c</sup>                                                                              | mc <sup>2</sup> 6406 glyV::2H9 (integrating cosmid containing <i>M. tuberculosis</i> genome region 'Rv0982-Rv1011', † Hyg <sup>R</sup> )   | [111]<br>† |

|                                   |                                                                                                                                                  |            |
|-----------------------------------|--------------------------------------------------------------------------------------------------------------------------------------------------|------------|
| mc <sup>2</sup> 6893 <sup>c</sup> | mc <sup>2</sup> 6408 <i>glyV</i> ::4G4 (integrating cosmid containing <i>M. tuberculosis</i> genome region Rv1813c'-Rv1837c, Hyg <sup>R</sup> )  | [111]<br>† |
| mc <sup>2</sup> 6894 <sup>c</sup> | mc <sup>2</sup> 6409 <i>glyV</i> ::7C12 (integrating cosmid containing <i>M. tuberculosis</i> genome region Rv2180c'-Rv2211c, Hyg <sup>R</sup> ) | [111]<br>† |
| mc <sup>2</sup> 6895 <sup>c</sup> | mc <sup>2</sup> 6410 <i>glyV</i> ::3C12 (integrating cosmid containing <i>M. tuberculosis</i> genome region Rv3237c'-Rv3262', Hyg <sup>R</sup> ) | [111]<br>† |
| mc <sup>2</sup> 6896 <sup>c</sup> | mc <sup>2</sup> 6410 <i>glyV</i> ::6G2 integrating cosmid containing <i>M. tuberculosis</i> genome region Rv3225c'-Rv3257c, Hyg <sup>R</sup> )   | [111]<br>† |
| mc <sup>2</sup> 6897 <sup>c</sup> | mc <sup>2</sup> 6411 <i>glyV</i> ::1G9 (integrating cosmid containing <i>M. tuberculosis</i> genome region Rv1326'-Rv1356c, Hyg <sup>R</sup> )   | [111]<br>† |
| mc <sup>2</sup> 6898 <sup>c</sup> | mc <sup>2</sup> 6411 <i>glyV</i> ::8C3 (integrating cosmid containing <i>M. tuberculosis</i> genome region 'Rv1315-Rv1343c, Hyg <sup>R</sup> )   | [111]<br>† |
| mc <sup>2</sup> 6899 <sup>c</sup> | mc <sup>2</sup> 6413 <i>glyV</i> ::5C4 (integrating cosmid containing <i>M. tuberculosis</i> genome region 'Rv2825c-Rv2787, Hyg <sup>R</sup> )   | [111]<br>† |
| mc <sup>2</sup> 6900 <sup>c</sup> | mc <sup>2</sup> 6413 <i>glyV</i> ::1G3 (integrating cosmid containing <i>M. tuberculosis</i> genome region Rv3707c'-Rv3731', Hyg <sup>R</sup> )  | [111]<br>† |
| mc <sup>2</sup> 6901 <sup>c</sup> | mc <sup>2</sup> 6414 <i>glyV</i> ::6H12 (integrating cosmid containing <i>M. tuberculosis</i> genome region 'Rv3736-Rv3767c, Hyg <sup>R</sup> )  | [111]<br>† |
| mc <sup>2</sup> 6902 <sup>c</sup> | mc <sup>2</sup> 6417 <i>glyV</i> ::6B9 (integrating cosmid containing <i>M. tuberculosis</i> genome region 'Rv1187-Rv1223', Hyg <sup>R</sup> )   | [111]<br>† |
| mc <sup>2</sup> 6903 <sup>c</sup> | mc <sup>2</sup> 6417 <i>glyV</i> ::8D9 (integrating cosmid containing <i>M. tuberculosis</i> genome region 'Rv1182-Rv1208', Hyg <sup>R</sup> )   | [111]<br>† |

Hyg<sup>R</sup>)

mc<sup>2</sup>6904

mc<sup>2</sup>6206 ΔRv3727::γδres-sacB-hyg-γδres

†

<sup>a</sup> Rv ORF number refers to the *M. tuberculosis* ortholog of the *M. bovis* BCG gene identified by transposon mutagenesis.

<sup>b</sup> Two independent transposon hits identified for the same ORF.

<sup>c</sup> Indicates a cosmid integrant (*M. tuberculosis* genomic cosmid library); confirmed by PCR from phenol/chloroform-extracted culture boil-preps.

† Constructed as part of this study.

**Table S2.** Genes significantly over-represented 2-fold or more in intracellular *fdr8* compared to intracellular mc<sup>2</sup>6455 (wild type), 3 days post THP-1 cell infection.

| ORF      | Gene Function <sup>a</sup>                                | Fold change<br>compared to wild type |
|----------|-----------------------------------------------------------|--------------------------------------|
| MT0023   | hypothetical protein                                      | 2.59                                 |
| MT0530   | glutamyl-tRNA reductase                                   | 4.27                                 |
| MT0955   | phosphate abc transporter, phosphate-binding protein      | 4.24                                 |
| MT1479   | hypothetical protein                                      | 2.58                                 |
| MT1838.1 | hypothetical protein                                      | 2.65                                 |
| MT1839.1 | hypothetical protein                                      | 3.54                                 |
| MT3137   | ribonucleotide-diphosphate reductase alpha subunit        | 3.24                                 |
| MT3615.1 | PE-PGRS family protein; gene contains a frame shift       | 3.03                                 |
| MT3693   | hypothetical protein                                      | 2.61                                 |
| Rv0005   | DNA topoisomerase IV subunit b                            | 4.10                                 |
| Rv0007   | possible conserved membrane protein                       | 2.62                                 |
| Rv0009   | iron-regulated peptidyl-prolyl cis-trans isomerase a PpiA | 4.70                                 |
| Rv0013   | para-aminobenzoate synthase component II                  | 3.01                                 |
| Rv0014c  | transmembrane serine/threonine-protein kinase b PknB      | 3.86                                 |
| Rv0019c  | hypothetical protein                                      | 3.06                                 |
| Rv0020c  | hypothetical protein                                      | 5.09                                 |
| Rv0053   | 30s ribosomal protein s6                                  | 2.73                                 |
| Rv0055   | 30s ribosomal protein s18                                 | 3.20                                 |

---

|         |                                                     |      |
|---------|-----------------------------------------------------|------|
| Rv0125  | probable serine protease PepA (MTB32a)              | 4.80 |
| Rv0171  | mce-family protein Mce1C                            | 5.95 |
| Rv0172  | mce-family protein Mce1D                            | 4.76 |
| Rv0173  | possible mce-family lipoprotein LprK; Mce1E         | 6.33 |
| Rv0175  | probable conserved mce associated membrane protein  | 2.56 |
| Rv0199  | probable conserved membrane protein                 | 2.53 |
| Rv0220  | probable esterase LipC                              | 4.10 |
| Rv0230c | probable phosphotriesterase php                     | 3.98 |
| Rv0277c | hypothetical protein                                | 5.11 |
| Rv0299  | hypothetical protein                                | 2.64 |
| Rv0308  | probable conseved integral membrane protein         | 4.24 |
| Rv0337c | aspartate aminotransferase                          | 4.23 |
| Rv0349  | hypothetical protein                                | 2.74 |
| Rv0353  | heat shock protein transcriptional repressor RspR   | 2.49 |
| Rv0407  | f420-dependent glucose-6-phosphate dehydrogenase    | 2.73 |
| Rv0436c | cdp-diacylglycerol-serine o-phosphatidyltransferase | 3.54 |
| Rv0441c | hypothetical protein                                | 4.31 |
| Rv0461  | probable transmembrane protein                      | 2.79 |
| Rv0535  | 5'-methylthioadenosine phosphorylase                | 2.43 |
| Rv0557  | mannosyltransferase PimB                            | 2.63 |
| Rv0568  | possible cytochrome p450 135b1 cyp135b1             | 2.55 |



---

|         |                                           |      |
|---------|-------------------------------------------|------|
| Rv0635  | hypothetical protein                      | 4.25 |
| Rv0642c | methoxy mycolic acid synthase 4 MmaA4     | 2.92 |
| Rv0668  | DNA-directed RNA polymerase beta' subunit | 5.82 |
| Rv0670  | endonuclease IV                           | 3.40 |
| Rv0684  | elongation factor ef-2                    | 2.37 |
| Rv0685  | elongation factor tu                      | 4.21 |
| Rv0697  | probable dehydrogenase                    | 3.03 |
| Rv0702  | 50s ribosomal protein l4                  | 3.05 |
| Rv0704  | 50s ribosomal protein l2                  | 4.33 |
| Rv0714  | 50s ribosomal protein l14                 | 2.85 |
| Rv0715  | 50s ribosomal protein l24                 | 2.46 |
| Rv0716  | 50s ribosomal protein l5                  | 3.26 |
| Rv0718  | 30s ribosomal protein s8                  | 3.99 |
| Rv0719  | 50s ribosomal protein l6                  | 3.18 |
| Rv0723  | 50s ribosomal protein l15                 | 3.40 |
| Rv0831c | hypothetical protein                      | 3.89 |
| Rv0883c | hypothetical protein                      | 2.81 |
| Rv0952  | succinyl-coa synthetase alpha subunit     | 4.73 |
| Rv0953c | possible oxidoreductase                   | 2.84 |
| Rv0996  | probable conserved transmembrane protein  | 2.86 |
| Rv1013  | acyl-CoA synthase                         | 4.34 |

---

|         |                                                           |      |
|---------|-----------------------------------------------------------|------|
| Rv1080c | transcription elongation factor GreA                      | 5.62 |
| Rv1177  | probable ferredoxin FdxC                                  | 2.58 |
| Rv1201c | probable transferase                                      | 2.67 |
| Rv1211  | hypothetical protein                                      | 3.64 |
| Rv1303  | hypothetical protein                                      | 2.91 |
| Rv1323  | acetyl-CoA acetyltransferase                              | 4.41 |
| Rv1363c | possible membrane protein                                 | 2.57 |
| Rv1388  | putative integration host factor mihf                     | 3.94 |
| Rv1410c | aminoglycosides/tetracycline-transport integral membrane  | 2.67 |
| Rv1422  | hypothetical protein                                      | 2.48 |
| Rv1435c | probable conserved pro, gly, val-rich secreted protein    | 4.31 |
| Rv1462  | hypothetical protein                                      | 4.54 |
| Rv1545  | hypothetical protein                                      | 3.95 |
| Rv1641  | translation initiation factor if-3                        | 3.41 |
| Rv1642  | 50s ribosomal protein l35                                 | 3.10 |
| Rv1785c | probable cytochrome p450 143 cyp143                       | 4.29 |
| Rv1787  | ppe family protein                                        | 4.76 |
| Rv1789  | ppe family protein                                        | 4.40 |
| Rv1791  | pe family protein                                         | 2.68 |
| Rv1793  | putative esat-6 like protein esxn (esat-6 like protein 5) | 3.10 |
| Rv1794  | hypothetical protein                                      | 3.25 |

|         |                                                       |      |
|---------|-------------------------------------------------------|------|
| Rv1796  | probable proline rich membrane-anchored mycosin mycp5 | 2.45 |
| Rv1830  | hypothetical protein                                  | 4.38 |
| Rv1846c | possible transcriptional regulatory protein           | 2.42 |
| Rv1916  | isocitrate lyase                                      | 4.06 |
| Rv1926c | immunogenic protein mpt63                             | 2.77 |
| Rv1932  | thiol peroxidase                                      | 5.28 |
| Rv2054  | hypothetical protein                                  | 3.68 |
| Rv2094c | twin argininte translocase protein a                  | 2.85 |
| Rv2177c | possible transposase                                  | 3.02 |
| Rv2196  | probable ubiquinol-cytochrome c reductase qcrb        | 2.91 |
| Rv2199c | possible conserved integral membrane protein          | 3.49 |
| Rv2200c | probable transmembrane cytochrome c oxidase ctac      | 3.82 |
| Rv2220  | glutamine synthetase glna1 (glutamine synthase)       | 4.76 |
| Rv2258c | possible transcriptional regulatory protein           | 2.44 |
| Rv2376c | low molecular weight antigen cfp2                     | 3.61 |
| Rv2428  | alkyl hydroperoxide reductase c protein ahpc          | 3.89 |
| Rv2468c | hypothetical protein                                  | 3.68 |
| Rv2469c | hypothetical protein                                  | 2.53 |
| Rv2584c | adenine phosphoribosyltransferase                     | 2.67 |
| Rv2586c | protein export protein secf                           | 3.22 |
| Rv2617c | probable transmembrane protein                        | 2.87 |

---

|         |                                                       |      |
|---------|-------------------------------------------------------|------|
| Rv2621c | possible transcriptional regulatory protein           | 2.42 |
| Rv2676c | hypothetical protein                                  | 3.90 |
| Rv2723  | probable conserved integral membrane protein          | 2.65 |
| Rv2783c | polynucleotide phosphorylase, pnpase                  | 4.13 |
| Rv2861c | methionine aminopeptidase                             | 2.89 |
| Rv2888c | amidase                                               | 2.39 |
| Rv2889c | elongation factor ts                                  | 3.97 |
| Rv2949c | hypothetical protein                                  | 3.73 |
| Rv2950c | acyl-coa synthase                                     | 4.88 |
| Rv2954c | hypothetical protein                                  | 3.21 |
| Rv3139  | probable acyl-coa dehydrogenase fade24                | 3.94 |
| Rv3157  | nadh dehydrogenase subunit m                          | 4.22 |
| Rv3211  | probable atp-dependent rna helicase rhle              | 4.22 |
| Rv3222c | hypothetical protein                                  | 3.09 |
| Rv3246c | two component regulatory protein mtra                 | 2.90 |
| Rv3248c | s-adenosyl-l-homocysteine hydrolase                   | 3.74 |
| Rv3277  | probable conserved transmembrane protein              | 2.43 |
| Rv3280  | probable propionyl-coa carboxylase beta chain 5 accd5 | 3.48 |
| Rv3281  | hypothetical protein                                  | 2.96 |
| Rv3299c | probable arylsulfatase atsb                           | 3.07 |
| Rv3456c | 50s ribosomal protein l17                             | 5.00 |

---

|         |                                                   |      |
|---------|---------------------------------------------------|------|
| Rv3460c | 30s ribosomal protein s13                         | 2.91 |
| Rv3461c | 50s ribosomal protein l36                         | 2.76 |
| Rv3465  | "dtdp-4-dehydrorhamnose 3,5-epimerase rmlc        | 3.07 |
| Rv3496c | mce-family protein Mce4D                          | 2.37 |
| Rv3513c | probable fatty-acid-coa ligase fadd18             | 2.39 |
| Rv3587c | probable conserved membrane protein               | 2.67 |
| Rv3596c | atp-dependent protease atp-binding subunit clpc1  | 3.61 |
| Rv3597c | probable iron-regulated lsr2 protein precursor    | 2.88 |
| Rv3611  | hypothetical arginine and proline rich protein    | 2.42 |
| Rv3613c | hypothetical protein                              | 4.41 |
| Rv3614c | hypothetical protein                              | 6.03 |
| Rv3623  | probable conserved lipoprotein lpqg               | 2.57 |
| Rv3723  | probable conserved transmembrane protein          | 2.54 |
| Rv3780  | hypothetical protein                              | 4.43 |
| Rv3798  | probable transposase                              | 3.29 |
| Rv3804c | secreted antigen 85-a fbpa (antigen 85 complex a) | 4.69 |
| Rv3846  | superoxide dismutase [fe] sodA                    | 4.00 |
| Rv3850  | hypothetical protein                              | 2.39 |
| Rv3914  | thioredoxin trxc (trx) (mpt46)                    | 2.48 |

---

<sup>a</sup> Annotated functions provided by TubercuList and BCGList.

**Table S3.** Genes significantly under-represented 2-fold or more in intracellular *fdr8* compared to intracellular mc<sup>2</sup>6455 (wild type), 3 days post THP-1 cell infection.

| ORF      | Gene Function <sup>a</sup>                   | Fold change<br>compared to wild type |
|----------|----------------------------------------------|--------------------------------------|
| MT1775   | hypothetical protein                         | −3.40                                |
| MT1931.1 | hypothetical protein                         | −6.01                                |
| MT2045   | hypothetical protein                         | −4.54                                |
| MT2094   | transcriptional regulator, ArsR family       | −4.45                                |
| MT2174   | hypothetical protein                         | −5.41                                |
| Rv0058   | replicative DNA helicase                     | −3.07                                |
| Rv0065   | hypothetical protein                         | −2.99                                |
| Rv0108c  | hypothetical protein                         | −3.40                                |
| Rv0118c  | hypothetical protein                         | −3.84                                |
| Rv0232   | probable TetR/AcrR transcriptional regulator | −3.48                                |
| Rv0251c  | heat shock protein hsp                       | −2.88                                |
| Rv0264c  | hypothetical protein                         | −5.30                                |
| Rv0476   | possible conserved transmembrane protein     | −2.98                                |
| Rv0539   | probable dolichyl-phosphate sugar synthase   | −3.28                                |
| Rv0560c  | possible benzoquinone methyltransferase      | −3.52                                |
| Rv0744c  | possible transcriptional regulatory protein  | −2.92                                |
| Rv0789c  | hypothetical protein                         | −3.02                                |
| Rv0847   | probable lipoprotein LpqS                    | −4.44                                |

---

|         |                                             |       |
|---------|---------------------------------------------|-------|
| Rv0871  | probable cold shock-like protein B CspB     | −2.96 |
| Rv0990c | hypothetical protein                        | −5.99 |
| Rv1029  | potassium-transporting ATPase subunit A     | −4.02 |
| Rv1059  | hypothetical protein                        | −4.36 |
| Rv1232c | hypothetical protein                        | −4.30 |
| Rv1406  | methionyl-tRNA formyltransferase            | −3.17 |
| Rv1443c | hypothetical protein                        | −3.70 |
| Rv1510  | conserved probable membrane protein         | −3.02 |
| Rv1535  | hypothetical protein                        | −2.92 |
| Rv1588c | Partial REP13E12 repeat protein             | −3.05 |
| Rv1678  | probable integral membrane protein          | −3.49 |
| Rv1907c | hypothetical protein                        | −2.90 |
| Rv1909c | ferric uptake regulation protein FurA       | −5.52 |
| Rv1952  | hypothetical protein                        | −3.58 |
| Rv1989c | hypothetical protein                        | −3.90 |
| Rv1990c | probable transcriptional regulatory protein | −4.13 |
| Rv2020c | hypothetical protein                        | −3.93 |
| Rv2021c | possible transcriptional regulatory protein | −3.19 |
| Rv2022c | hypothetical protein                        | −3.31 |
| Rv2034  | Probable ArsR-type repressor protein        | −5.49 |
| Rv2036  | hypothetical protein                        | −3.72 |

---

|         |                                                          |       |
|---------|----------------------------------------------------------|-------|
| Rv2558  | hypothetical protein                                     | −4.23 |
| Rv2694c | hypothetical protein                                     | −3.08 |
| Rv2745c | possible transcriptional regulatory protein              | −3.37 |
| Rv2926c | hypothetical protein                                     | −2.94 |
| Rv3250c | probable rubredoxin RubB                                 | −3.28 |
| Rv3252c | probable transmembrane alkane 1-monooxygenase AlkB       | −3.54 |
| Rv3270  | probable metal cation-transporting p-type atpase c ctpc  | −2.43 |
| Rv3295  | probable transcriptional regulatory protein, tetr-family | −2.96 |
| Rv3473c | possible peroxidase BpoA                                 | −3.51 |
| Rv3546  | acetyl-CoA acetyltransferase                             | −2.95 |
| Rv3557c | probable transcriptional regulatory protein TetR-family  | −3.60 |
| Rv3705c | hypothetical protein                                     | −4.69 |
| Rv3714c | hypothetical protein                                     | −5.14 |
| Rv3753c | hypothetical protein                                     | −4.71 |
| Rv3841  | possible bacterioferritin bfrB                           | −2.27 |

---

<sup>a</sup> Annotated functions provided by TubercuList and BCGList.



**Table S4.** Genes significantly over-represented in *fdr8*-infected THP-1 cells, compared to mc<sup>2</sup>6455 (BCG parent) -infected THP-1 cells, 3 days post infection.

| Gene         | mRNA Accession <sup>a</sup> | mRNA Description <sup>b</sup>                                                                         | Fold-change |
|--------------|-----------------------------|-------------------------------------------------------------------------------------------------------|-------------|
| MIR223       | NR_029637                   | microRNA 223 (MIR223), microRNA.                                                                      | 2.01        |
| MIRLET7F1    | NR_029483                   | microRNA let-7f-1 (MIRLET7F1), microRNA.                                                              | 1.92        |
| THBS1        | NM_003246                   | thrombospondin 1 (THBS1).                                                                             | 1.63        |
| UQCRB        | NM_006294                   | ubiquinol-cytochrome c reductase binding protein (UQCRB), nuclear gene encoding mitochondrial protein | 1.60        |
| VCAM1        | NM_001078                   | vascular cell adhesion molecule 1 (VCAM1), transcript variant 1                                       | 1.59        |
| MIR24-2      | NR_029497                   | microRNA 24-2 (MIR24-2), microRNA.                                                                    | 1.56        |
| TRIM52       | NM_032765                   | tripartite motif-containing 52 (TRIM52)                                                               | 1.53        |
| WEE1         | BX641032                    | cDNA DKFZp686I18166                                                                                   | 1.52        |
| C5orf54      | NM_022090                   | chromosome 5 open reading frame 54                                                                    | 1.50        |
| MIR17HG      | NR_027350                   | MIR17 host gene (non-protein coding) (MIR17HG), non-coding RNA.                                       | 1.49        |
| MIR222       | NR_029636                   | microRNA 222 (MIR222), microRNA.                                                                      | 1.49        |
| CXCR5        | NM_001716                   | chemokine (C-X-C motif) receptor 5 (CXCR5), transcript variant 1                                      | 1.48        |
| RRP7B        | BC014647                    | cDNA clone IMAGE:4646900.                                                                             | 1.48        |
| LOC100131860 | AK097109                    | cDNA FLJ39790 fis, clone SPLEN2003204.                                                                | 1.46        |
| CXCL6        | NM_002993                   | chemokine (C-X-C motif) ligand 6 (granulocyte chemotactic protein 2) (CXCL6)                          | 1.42        |
| MIR15A       | NR_029485                   | microRNA 15a (MIR15A), microRNA.                                                                      | 1.41        |

|              |              |                                                                                |      |
|--------------|--------------|--------------------------------------------------------------------------------|------|
| CCL20        | NM_004591    | chemokine (C-C motif) ligand 20 (CCL20), transcript variant 1                  | 1.40 |
| MIR146A      | NR_029701    | microRNA 146a (MIR146A), microRNA.                                             | 1.40 |
| AREG         | NM_001657    | amphiregulin (AREG)                                                            | 1.39 |
| C3orf78      | NM_001124767 | chromosome 3 open reading frame 78 .                                           | 1.38 |
| SNHG12       | AY277594     | transformation-related protein 11 (TRG11)                                      | 1.38 |
| GFPT2        | NM_005110    | glutamine-fructose-6-phosphate transaminase 2 (GFPT2)                          | 1.37 |
| SHROOM3      | NM_020859    | shroom family member 3 (SHROOM3)                                               | 1.35 |
| LOC100130428 | BC040288     | Homo sapiens cDNA clone IMAGE:4822341.                                         | 1.35 |
| PELO         | NM_015946    | pelota homolog (Drosophila) (PELO)                                             | 1.35 |
| FAM36A       | NM_198076    | family with sequence similarity 36, member A                                   | 1.34 |
| MIRLET7G     | NR_029660    | microRNA let-7g (MIRLET7G), microRNA.                                          | 1.33 |
| KCNRG        | NM_173605    | potassium channel regulator, transcript variant 1                              | 1.32 |
| TNFAIP6      | NM_007115    | tumor necrosis factor, alpha-induced protein 6                                 | 1.32 |
| DUSP5P       | AK055963     | cDNA FLJ31401 fis, clone NT2NE2000038.                                         | 1.32 |
| GRIK2        | NM_175768    | glutamate receptor, ionotropic, kainate 2 transcript variant 2                 | 1.31 |
| DUSP5P       | NR_002834    | dual specificity phosphatase 5 pseudogene, non-coding RNA.                     | 1.31 |
| EHD1         | NM_006795    | EH-domain containing 1 (EHD1)                                                  | 1.30 |
| CXCL1        | NM_001511    | chemokine (C-X-C motif) ligand 1 (melanoma growth stimulating activity, alpha) | 1.30 |

|         |              |                                                                                                  |      |
|---------|--------------|--------------------------------------------------------------------------------------------------|------|
| SLC7A2  | NM_003046    | solute carrier family 7 (cationic amino acid transporter, y+ system), member 2, transcript var 1 | 1.29 |
| MIR30E  | NR_029846    | microRNA 30e (MIR30E), microRNA.                                                                 | 1.28 |
| PSTPIP2 | NM_024430    | pro-ser-thre phosphatase interacting protein 2                                                   | 1.28 |
| GPR141  | NM_181791    | G protein-coupled receptor 141 (GPR141)                                                          | 1.28 |
| TTC14   | NM_133462    | tetratricopeptide repeat domain 14, transcript var 1                                             | 1.28 |
| PARM1   | NM_015393    | prostate androgen-regulated mucin-like protein 1                                                 | 1.27 |
| DCAF16  | NM_017741    | DDB1 and CUL4 associated factor 16 (DCAF16)                                                      | 1.27 |
| AIDA    | NM_022831    | axin interactor, dorsalization associated (AIDA)                                                 | 1.26 |
| RBM14   | NM_006328    | RNA binding motif protein 14 (RBM14)                                                             | 1.26 |
| CCL4L1  | NM_001001435 | chemokine (C-C motif) ligand 4-like 1                                                            | 1.26 |
| CCL4    | NM_002984    | chemokine (C-C motif) ligand 4,transcript variant 1                                              | 1.26 |
| CCL19   | NM_006274    | chemokine (C-C motif) ligand 19 (CCL19)                                                          | 1.25 |
| SVIP    | NM_148893    | small VCP/p97-interacting protein (SVIP)                                                         | 1.25 |
| NCF1    | NM_000265    | neutrophil cytosolic factor 1 (NCF1)                                                             | 1.24 |
| SLC7A11 | NM_014331    | solute carrier family 7, (cationic amino acid transporter, y+ system) member 11                  | 1.24 |
| NCF1    | NM_000265    | neutrophil cytosolic factor 1 (NCF1)                                                             | 1.24 |
| NCF1    | NM_000265    | neutrophil cytosolic factor 1 (NCF1)                                                             | 1.23 |
| CCL4L1  | NM_001001435 | chemokine (C-C motif) ligand 4-like 1 (CCL4L1)                                                   | 1.22 |
| CCL4L1  | NM_001001435 | chemokine (C-C motif) ligand 4-like 1 (CCL4L1)                                                   | 1.22 |
| WRN     | NM_000553    | Werner syndrome, RecQ helicase-like (WRN)                                                        | 1.22 |

---

|          |              |                                                                                                                                                 |      |
|----------|--------------|-------------------------------------------------------------------------------------------------------------------------------------------------|------|
| NBPF4    | NM_001143989 | neuroblastoma breakpoint family, member 4                                                                                                       | 1.22 |
| ARGLU1   | NM_018011    | arginine and glutamate rich 1 (ARGLU1)                                                                                                          | 1.22 |
| NBPF6    | NM_001143987 | neuroblastoma breakpoint family, member 6, transcript variant 1                                                                                 | 1.21 |
| MAP1LC3A | NM_032514    | microtubule-associated protein 1 light chain 3 alpha, transcript variant 1                                                                      | 1.21 |
| COL8A1   | NM_001850    | collagen, type VIII, alpha 1, transcript variant 1                                                                                              | 1.20 |
| OGT      | NM_181672    | O-linked N-acetylglucosamine (GlcNAc) transferase (UDP-N-acetylglucosamine: polypeptide-N-acetylglucosaminyl transferase), transcript variant 1 | 1.19 |
| CRIM1    | NM_016441    | cysteine rich transmembrane BMP regulator 1 (chordin-like)                                                                                      | 1.18 |
| IL1B     | NM_000576    | interleukin 1, beta (IL1B)                                                                                                                      | 1.18 |
| ZCCHC5   | NM_152694    | zinc finger, CCHC domain containing 5 (ZCCHC5)                                                                                                  | 1.18 |
| PDGFRA   | NM_006206    | platelet-derived growth factor receptor, alpha polypeptide                                                                                      | 1.17 |
| GLMN     | NM_053274    | glomulin, FKBP associated protein (GLMN)                                                                                                        | 1.17 |
| CYP7B1   | NM_004820    | cytochrome P450, family 7, subfamily B, polypep1                                                                                                | 1.16 |
| MFSD8    | NM_152778    | major facilitator superfamily domain containing 8                                                                                               | 1.16 |

---

<sup>a</sup> mRNA accession numbers for human genes provided by UCSC Browser [112].

<sup>b</sup> Predicted functions provided by IPA and UCSC Browser.

**Table S5.** Genes significantly under-represented in *fdi8*-infected THP-1 cells, compared to mc<sup>2</sup>6455 (BCG parent) -infected THP-1 cells, 3 days post infection.

| Gene    | mRNA Accession <sup>a</sup> | mRNA Description <sup>b</sup>                                                                      | Fold-change |
|---------|-----------------------------|----------------------------------------------------------------------------------------------------|-------------|
| CHIT1   | NM_003465                   | chitinase 1 (chitotriosidase) (CHIT1)                                                              | −1.64       |
| METTL7B | NM_152637                   | methyltransferase like 7B (METTL7B)                                                                | −1.61       |
| ITGA3   | NM_002204                   | integrin, alpha 3 (antigen CD49C, alpha 3 subunit of VLA-3 receptor) (ITGA3), transcript variant a | −1.54       |
| MMP7    | NM_002423                   | matrix metalloproteinase 7 (MMP7)                                                                  | −1.53       |
| RNASE1  | NM_198232                   | ribonuclease, RNase A family, 1 (pancreatic) (RNASE1), transcript variant 3                        | −1.51       |
| MSR1    | NM_002445                   | macrophage scavenger receptor 1 (MSR1), transcript variant SR-AII                                  | −1.46       |
| DYSFIP1 | NM_001007533                | dysferlin interacting protein 1 (DYSFIP1)                                                          | −1.44       |
| CD180   | NM_005582                   | CD180 molecule (CD180)                                                                             | −1.43       |
| NYNRIN  | NM_025081                   | NYN domain and retroviral integrase containing (NYNRIN)                                            | −1.42       |
| VWA5A   | NM_001130142                | von Willebrand factor A domain containing 5A (VWA5A), transcript variant 3                         | −1.40       |
| FADS2   | NM_004265                   | fatty acid desaturase 2 (FADS2)                                                                    | −1.33       |
| GAS6    | NM_000820                   | growth arrest-specific 6 (GAS6), transcript variant 1                                              | −1.25       |

<sup>a</sup> mRNA accession numbers for human genes provided by UCSC Browser [112].

<sup>b</sup> Predicted functions provided by IPA and UCSC Browser.

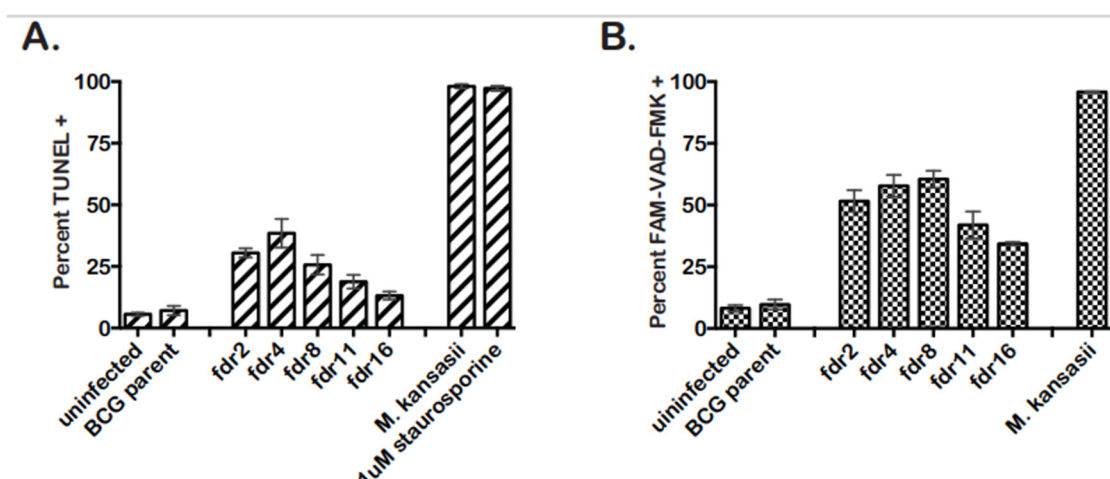

**Figure S1. Preliminary cell death analyses of *fdr*-infected THP-1 cells.** A. *fdr*-infected THP-1 cells are TUNEL positive. THP-1 cells were infected at an MOI 5:1 with mycobacteria strains. On day 3, cells were analyzed by TUNEL staining and fluorescence microscopy. B. *fdr*-infected THP-1 cells show activated caspases. Similarly infected THP-1 cells were stained on day 3 for poly-caspase activity and analyzed by microscopy. For both A. and B., cells were counted at 200X from three different fields, 100 cells per field. Data are shown from two independent experiments. For *fdr* infections \*  $P < 0.05$  relative to BCG parent control.

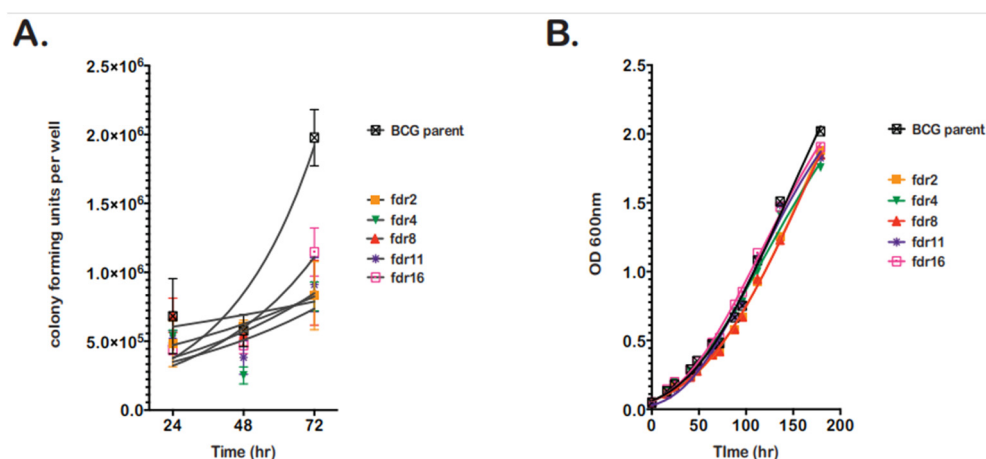

**Figure S2. In vitro and intracellular growth characteristics of *fdr* mutants.** A. *fdr* mutants show reduced cfu in THP-1 MΦ 3 days post-infection. THP-1 cells were infected with mycobacteria at an MOI 5:1 and 3 days post-infection, lysed in 0.05% SDS. Lysates were serially diluted in H<sub>2</sub>O from 100-10<sup>-7</sup> and spotted for cfus. 14 days later, mycobacteria colonies were counted. Data are averaged from three independent experiments. For *fdr* population \*\*\*  $P < 0.001$ , relative to BCG parent control. B. *fdr* mutants do not have a growth defect in complete 7H9 media. Mid-log phase cultures were inoculated to an OD<sub>600nm</sub> = 0.05 in complete 7H9 broth and monitored over 7 days for growth. Results shown are representative of two independent experiments with similar results. For all *fdr* mutants: not significant, relative to BCG parent control.

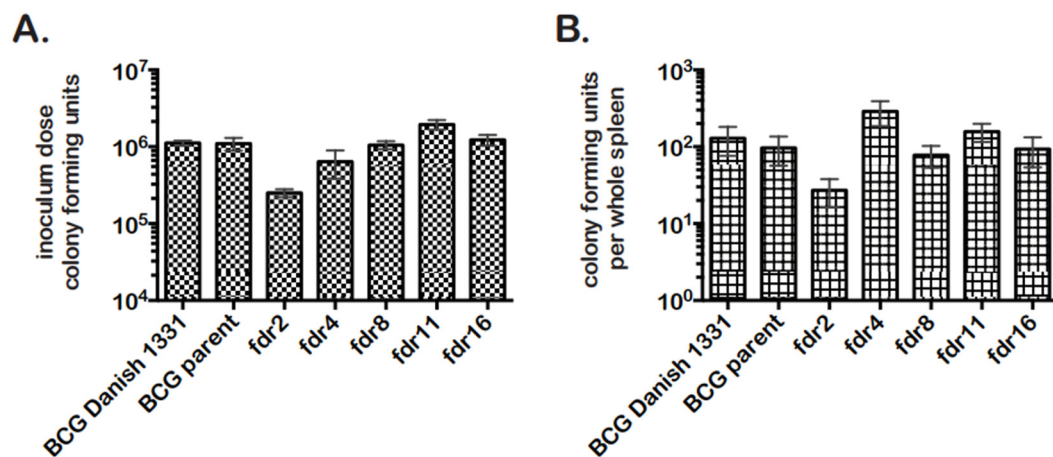

**Figure S3. *fdr*-mutants enhance *M. tuberculosis*-specific CD4 and CD8 T cell responses *in vivo*.** C57BL/6 mice were subcutaneously immunized with *fdr* mutants or controls, and 3 weeks post-immunization, spleens harvested for IFN- $\gamma$  ELISPOT. A. Inoculum dose of bacterial strains used for ELISPOT experiment. B. Bacterial burden in spleen at harvest. Data are from one experiment, 3 mice per group; means and standard deviations are shown.

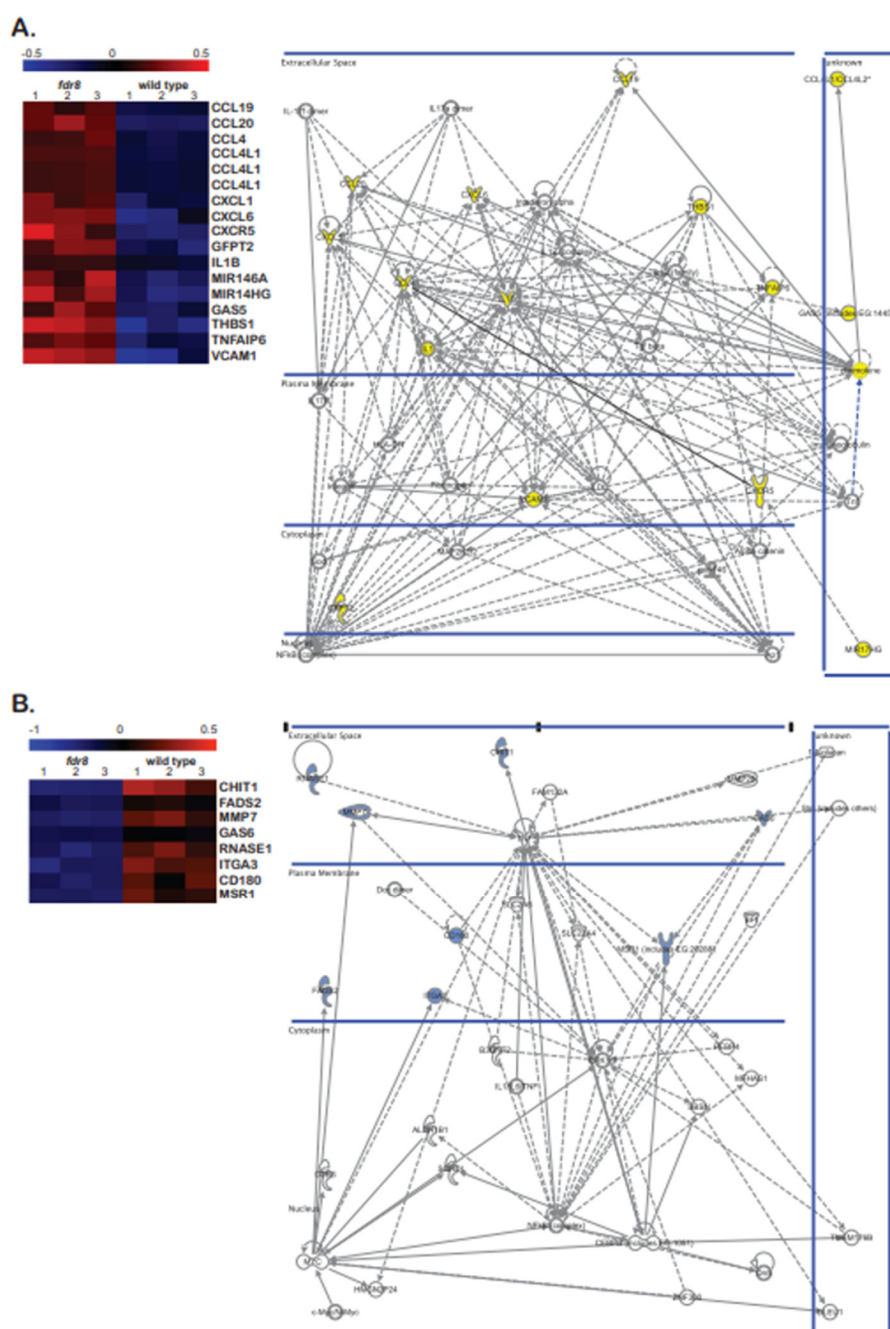

**Figure S4. MΦ functional pathways modulated by *fdr8*.** A. Significantly over-represented host genes in *fdr8*-infected THP-1 cells and Ingenuity Systems pathway analysis of significantly over-represented genes in *fdr8*-infected THP-1 cells, compared to BCG parent-infected control. Left: Mean-weighted expression of genes significantly over-represented in *fdr8*-infected THP-1 cells and part of the top enriched IPA biological network. Right: Top biological network significantly over-represented in *fdr8*-infected THP-1 cells. Genes identified by microarray are indicated in yellow. IPA provided subcellular localizations and interactions shown: solid lines indicate known protein-protein interactions, dotted lines indicate known expression relationships. B. Significantly under-represented host genes in *fdr8*-infected THP-1 cells and Ingenuity Systems pathway analysis of significantly under-represented genes in *fdr8*-infected THP-1 cells, compared to BCG parent-infected control. Left: Mean-weighted expression of genes significantly under-represented in *fdr8*-infected THP-1 cells and part of the top enriched IPA biological network. Right: Top biological network significantly under-represented in *fdr8*-infected THP-1 cells. Genes identified by microarray are indicated in blue. IPA-provided subcellular localizations and interactions shown: solid lines indicate known



protein-protein interactions, dotted lines indicate known expression relationships. All microarray results were analyzed using TIGR MeV software.

A.

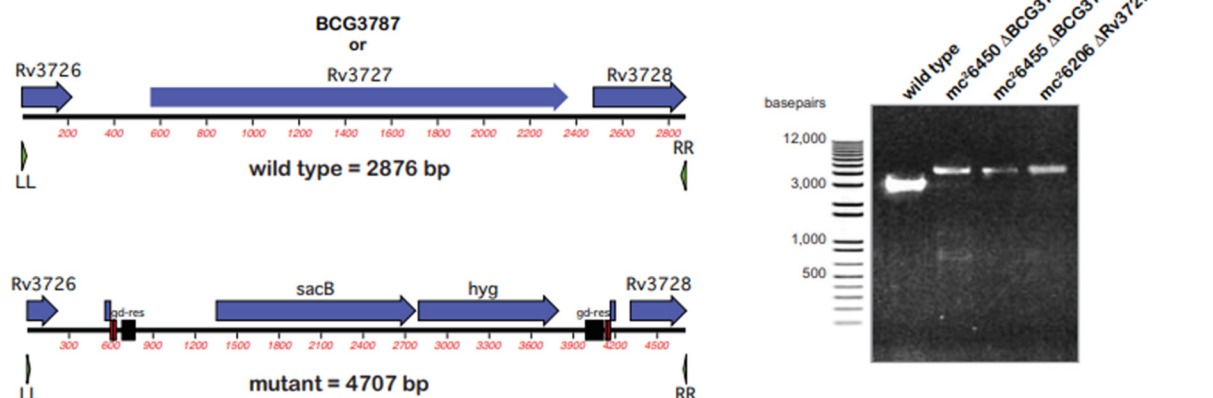

B.

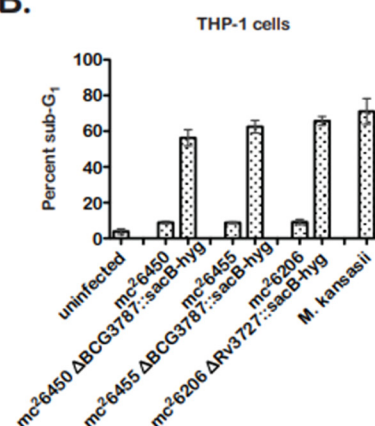

C.

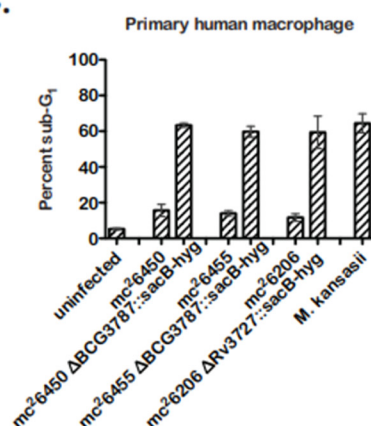

**Figure S5. Precise gene deletion of *fdx8* in *M. bovis* BCG Danish and *M. tuberculosis* *ΔpanCD ΔleuCD* induce pyroptosis of MΦ.** A. Expected PCR amplicon sizes are indicated for wild type and mutant strains (left panel). Confirmation of gene knockout by PCR is shown (right panel); wild type is mc26450 (BCG Danish strain 1331) genomic DNA. B. *Rv3727* null -induced pyroptosis in THP-1 cells. Mycobacteria strains were used to infect THP-1 cells at an MOI = 5:1, and 3 days later cells analyzed for cell death by sub-G<sub>1</sub> staining and flow cytometry. C. *Rv3727* null -induced pyroptosis in primary human MΦ. Similarly infected primary human MΦ were analyzed for cell death by sub-G<sub>1</sub> staining and flow cytometry. For both B. and C., data are from three independent experiments. For all *fdx* infections \*\*\*  $P < 0.001$ , relative to wild type control of each genetic background.

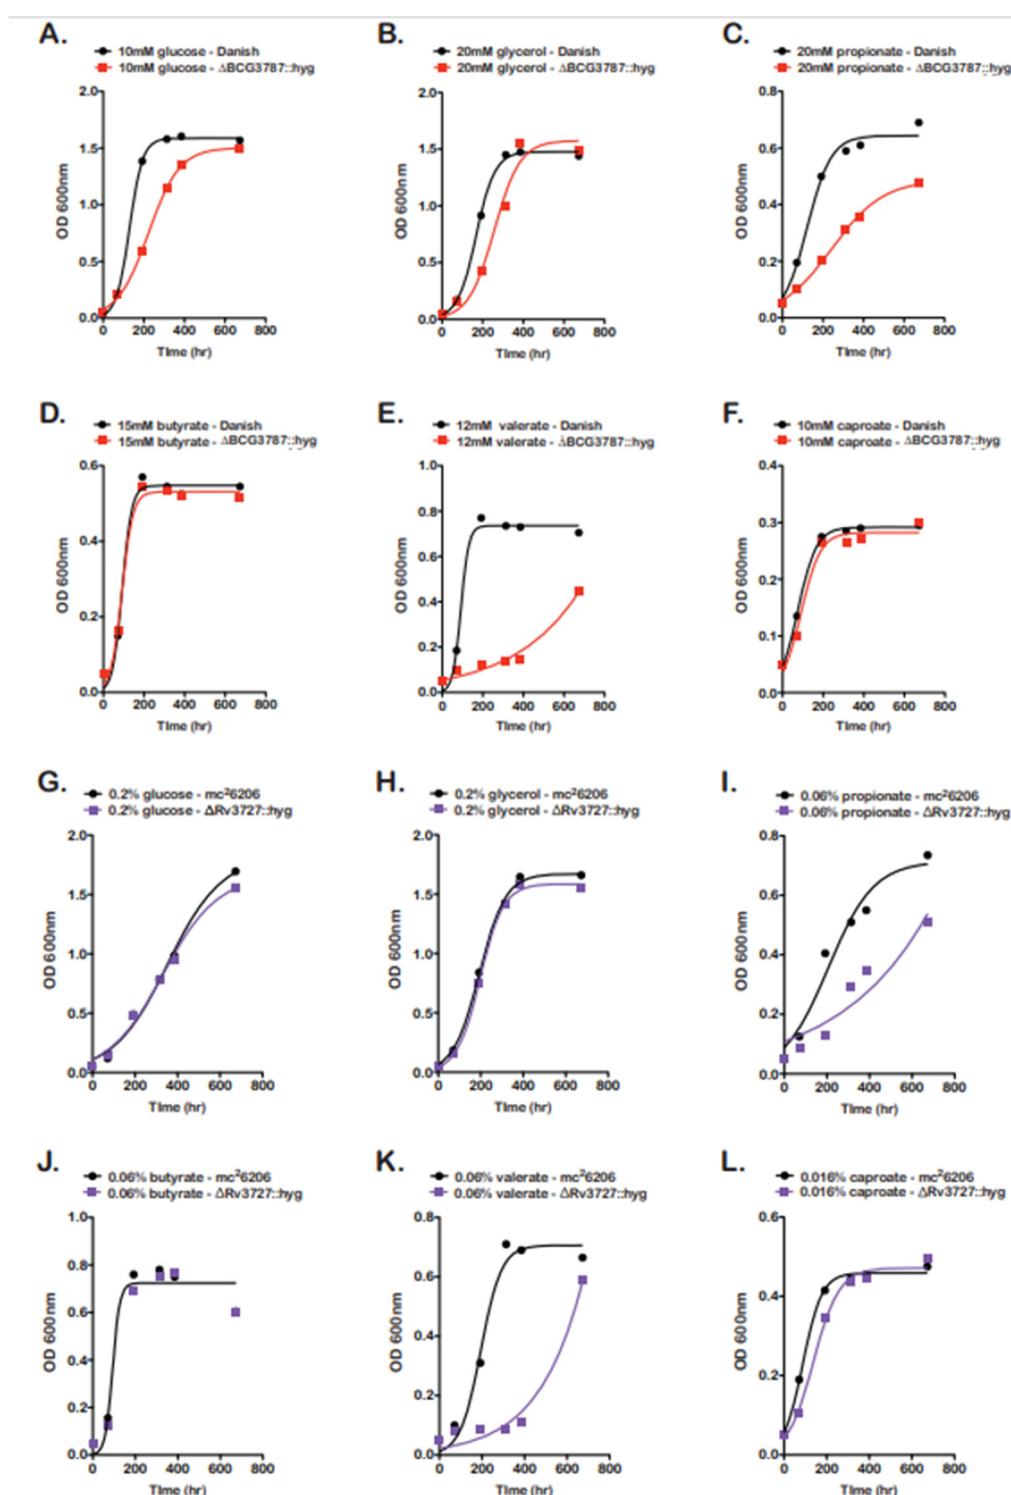

**Figure S6.** *fdr8* null mutants are defective for growth in odd-chain fatty acids. Mid-log phase bacteria were washed and resuspended to an OD<sub>600nm</sub> of 0.05 in media containing different carbon sources. Growth was monitored by OD<sub>600nm</sub> over 4 weeks. Growth curves are shown for *M. bovis* BCG Danish strains grown in A. glucose, B. glycerol, C. propionate, D. butyrate, E. valerate, F. caproate. Growth curves are shown for *M. tuberculosis*  $\Delta panCD \Delta leuCD$  strains grown in G. glucose, H. glycerol, I. propionate, J. butyrate, K. valerate, L. caproate. Logistic regression curve fitting analysis was done using GraphPad Prism 5 and used to calculate grown rate (*k*, see TABLE 3). Results are representative of two independent experiments with similar results. .
